# Supplementary material for: A combined crossed molecular beam and theorerical study of the O(3P,1D) + acrylonitrile (CH2CHCN) reactions and implications for combustion and extraterrestrial environments
Source: Royal Society of Chemistry journal article supplement (doi:10.1039/d3cp01558k), 2023-01-01
Supplement: d3cp01558k1.pdf [file d3cp01558k1.pdf]

**Electronic Supporting Information (ESI) for the paper**

**Combined crossed-beams and theoretical study of the  
O(<sup>3</sup>P, <sup>1</sup>D) + acrylonitrile (CH<sub>2</sub>CHCN) reactions and  
implications for combustion and extraterrestrial  
environments**

Giacomo Pannacci,<sup>a</sup> Luca Mancini,<sup>a</sup> Gianmarco Vanuzzo,<sup>a</sup> Pengxiao Liang,<sup>a</sup> Demian Marchione,<sup>a</sup>  
Marzio Rosi,<sup>b</sup> Piergiorgio Casavecchia,<sup>a</sup> and Nadia Balucani\*<sup>a</sup>

<sup>a</sup> *Dipartimento di Chimica, Biologia e Biotecnologie, Università degli Studi di Perugia, Perugia, Italy*

<sup>b</sup> *Dipartimento di Ingegneria Civile e Ambientale, Università degli Studi di Perugia, Perugia, Italy*

**Table T1:** List of all the possible combination of products identified for the O(<sup>3</sup>P, <sup>1</sup>D) + CH<sub>2</sub>CHCN reactions evaluated at the CCSD(T)/aug-cc-pVTZ//B3LYP/aug-cc-pVTZ level of theory.

|                                           |                                           |                                       |                         |
|-------------------------------------------|-------------------------------------------|---------------------------------------|-------------------------|
| O( <sup>3</sup> P) + CH <sub>2</sub> CHCN | →                                         | CH <sub>2</sub> CHN + CO              | - 179 kJ/mol            |
|                                           | →                                         | CH <sub>2</sub> CN + HCO              | - 126 kJ/mol            |
|                                           | →                                         | CH <sub>2</sub> CO + HCN              | - 119 kJ/mol            |
|                                           | →                                         | COCN + CH <sub>3</sub>                | - 69 kJ/mol             |
|                                           | →                                         | HCOCHCN + H                           | - 62 kJ/mol             |
|                                           | →                                         | CH <sub>2</sub> O + HCCN              | - 58 kJ/mol             |
|                                           | →                                         | OCCH <sub>2</sub> CN + H              | - 56 kJ/mol             |
|                                           | →                                         | HCOCH + HCN                           | - 40 kJ/mol             |
|                                           | →                                         | CH <sub>2</sub> COCN + H              | - 36 kJ/mol             |
|                                           | →                                         | CH <sub>2</sub> CH + NCO              | - 1 kJ/mol              |
|                                           | →                                         | CH <sub>3</sub> CO + CN               | + 4 kJ/mol              |
|                                           | →                                         | OCHCN + CH <sub>2</sub>               | + 5 kJ/mol              |
|                                           | →                                         | CHCHCN + OH                           | + 27 kJ/mol             |
|                                           | O( <sup>1</sup> D) + CH <sub>2</sub> CHCN | →                                     | CH <sub>3</sub> CN + CO |
| →                                         |                                           | CH <sub>2</sub> CNH + CO              | -538 kJ/mol             |
| →                                         |                                           | OCCHCN + H <sub>2</sub>               | - 509 kJ/mol            |
| →                                         |                                           | HNCO + H <sub>2</sub> CC              | - 322 kJ/mol            |
| →                                         |                                           | CH <sub>2</sub> CN + HCO              | - 316 kJ/mol            |
| →                                         |                                           | COCN + CH <sub>3</sub>                | - 259 kJ/mol            |
| →                                         |                                           | HCOCHCN + H                           | - 252 kJ/mol            |
| →                                         |                                           | OCCH <sub>2</sub> CN + H              | - 246 kJ/mol            |
| →                                         |                                           | CH <sub>2</sub> COCN + H              | - 226 kJ/mol            |
| →                                         |                                           | CH <sub>2</sub> NC + HCO              | - 218 kJ/mol            |
| →                                         |                                           | HCOCN + H <sub>2</sub>                | - 209 kJ/mol            |
| →                                         |                                           | CH <sub>2</sub> CH + OCN              | - 192 kJ/mol            |
| →                                         |                                           | CH <sub>2</sub> CNCO + H              | - 180 kJ/mol            |
| →                                         |                                           | <i>t</i> -HCOCHNC + H                 | - 164 kJ/mol            |
| →                                         |                                           | <i>c</i> -HCOCHNC + H                 | - 159 kJ/mol            |
| →                                         |                                           | OCCH <sub>2</sub> NC + H              | - 152 kJ/mol            |
| →                                         |                                           | <i>c</i> -CH <sub>2</sub> (O)CCN + H  | - 90 kJ/mol             |
| →                                         |                                           | <i>c</i> -CH(OCH)CN + H               | - 60 kJ/mol             |
| →                                         |                                           | <i>c</i> -CH <sub>2</sub> CCC(O)N + H | + 109 kJ/mol            |

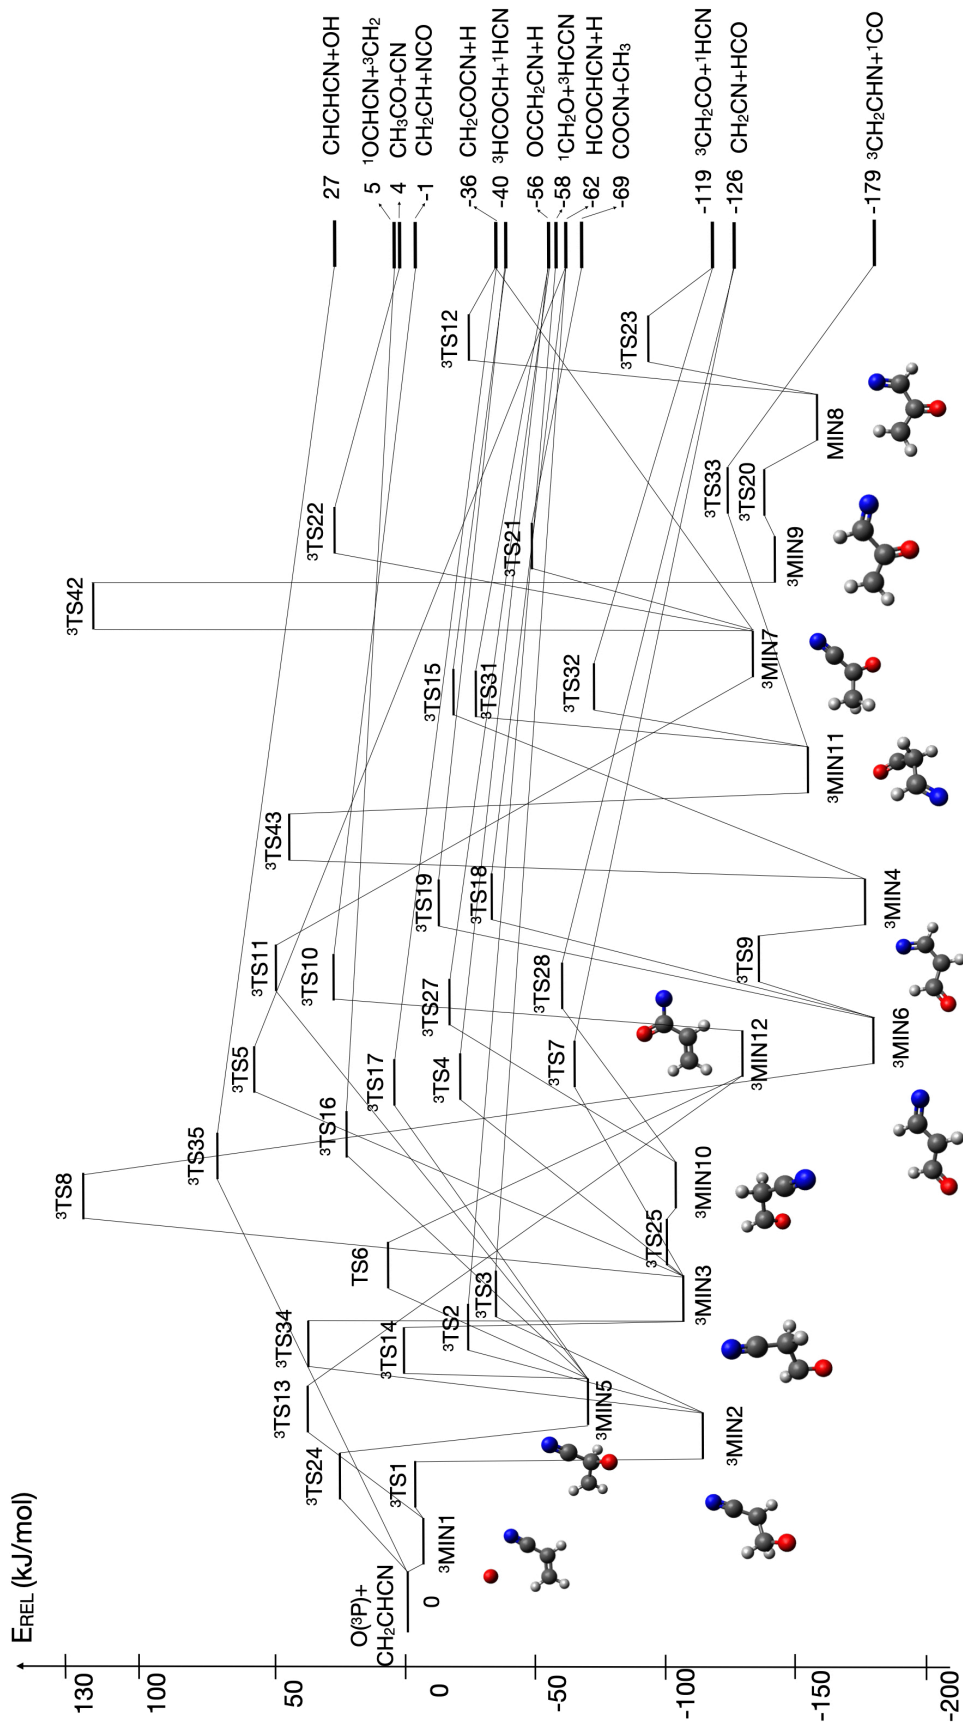

**Fig. S1:** Schematic representation of the global PES for the reaction  $O(^3P) + CH_2CHCN$ , with the energies evaluated at the CCSD(T)/aug-cc-pVTZ//B3LYP/aug-cc-pVTZ level of theory.

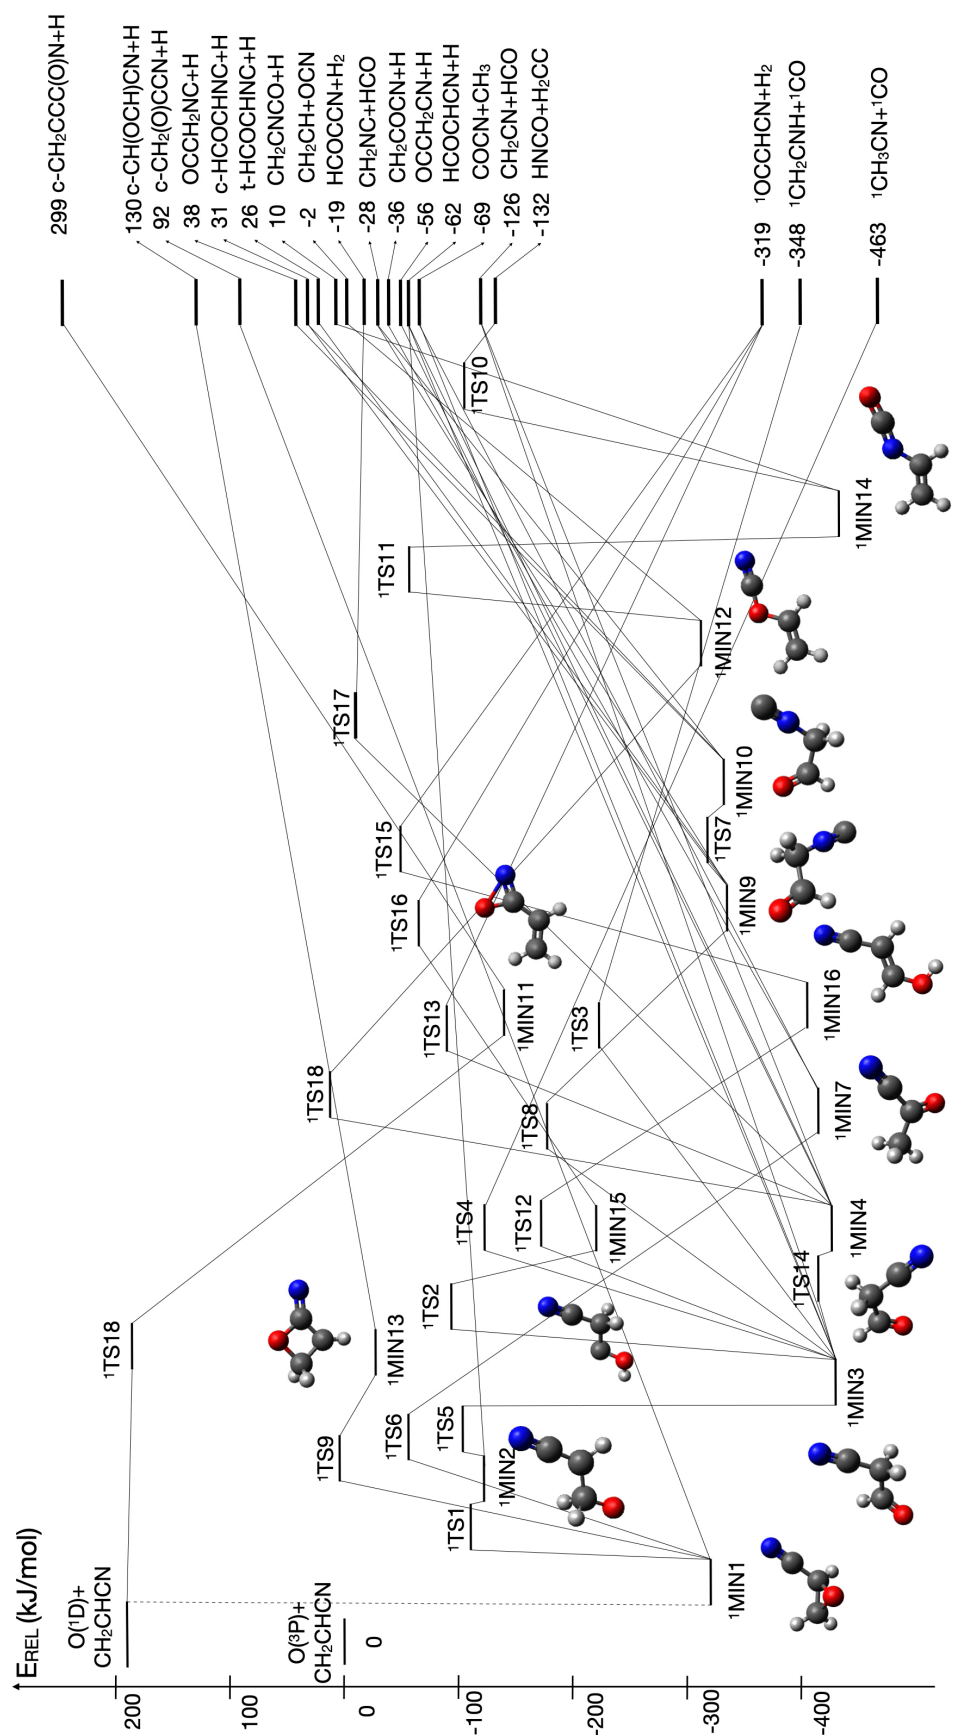

**Fig. S2:** Schematic representation of the global PES for the reaction O(<sup>1</sup>D) + CH<sub>2</sub>CHCN, with the energies evaluated at the CCSD(T)/aug-cc-pVTZ//B3LYP/aug-cc-pVTZ level of theory.

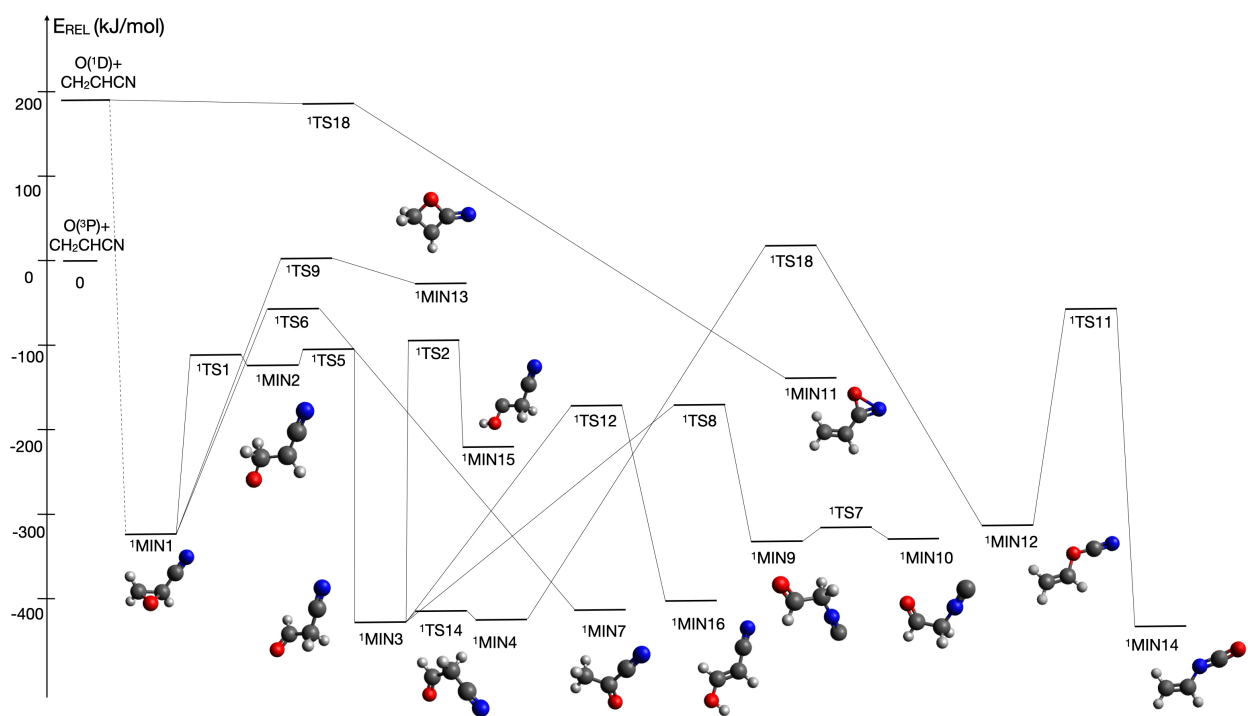

**Fig. S3:** Schematic representation of the isomerisation process identified in the singlet PES for the reaction  $O(^1D) + CH_2CHCN$ .

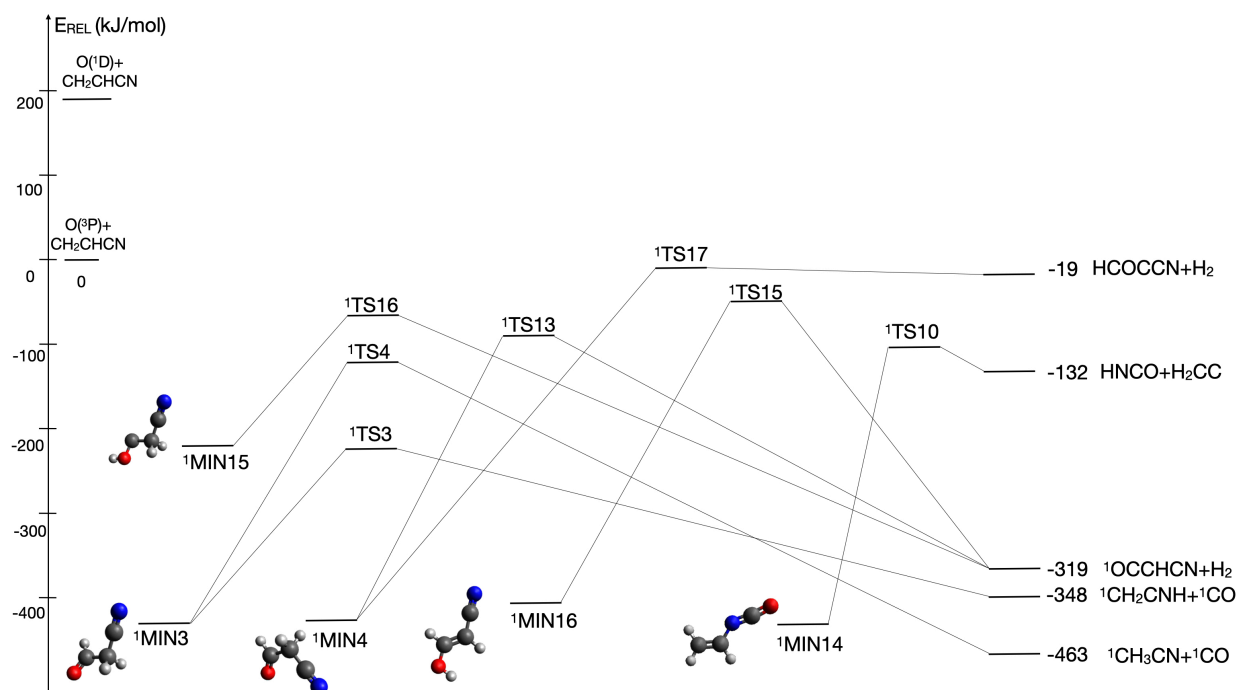

**Fig. S4:** Schematic representation of the singlet PES reporting the product channels with exit barrier for the reaction  $O(^1D) + CH_2CHCN$ .

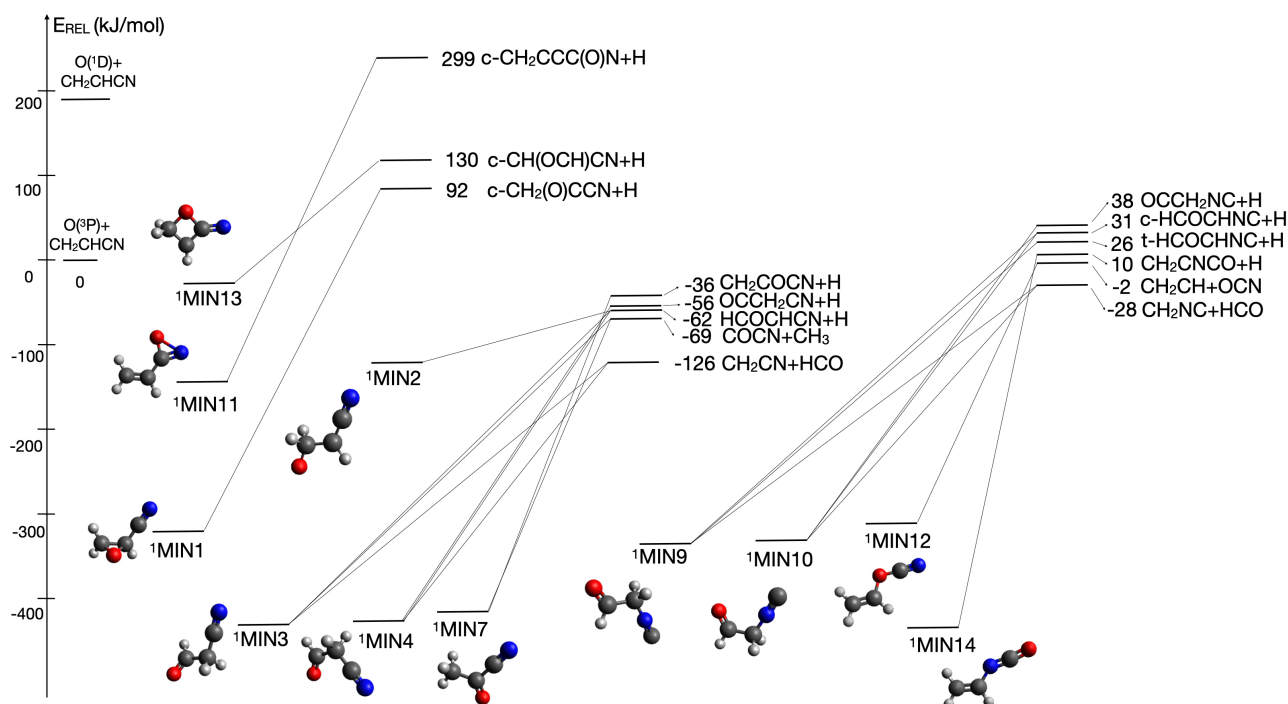

**Fig. S5:** Schematic representation of the singlet PES reporting the product channels without exit barrier for the reaction  $O(^1D) + CH_2CHCN$ .

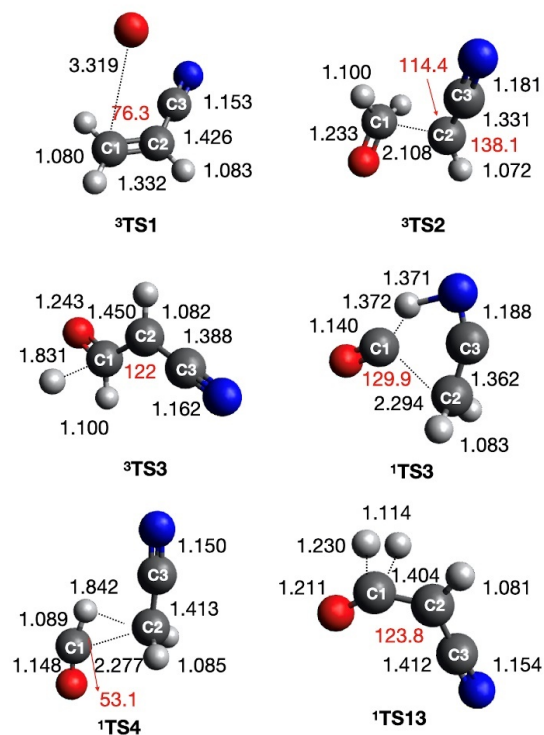

**Fig. S6:** B3LYP optimized geometries of the most important transition states identified along the triplet/singlet PESs for the  $O(^3P,^1D) +$  acrylonitrile reactions. The angles ( $^\circ$ ) are indicated in red, while the bond lengths ( $\text{\AA}$ ) are indicated in black.

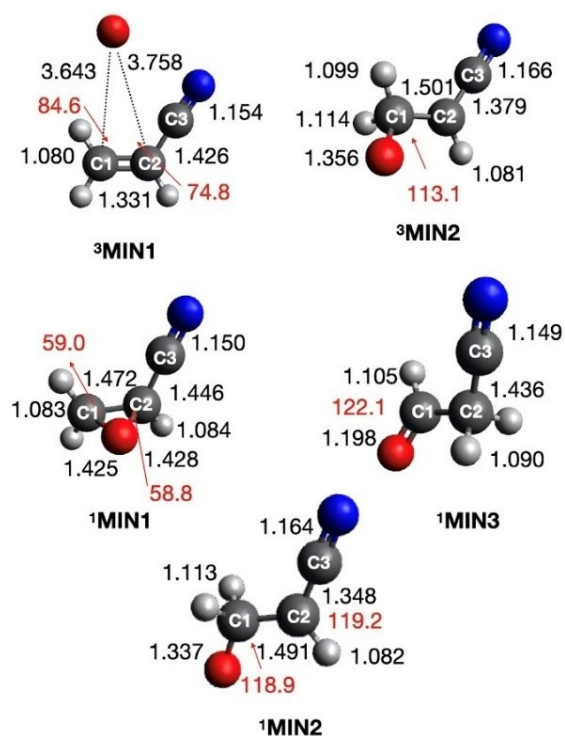

**Fig. S7:** B3LYP optimized geometries of the most important minima identified along the triplet/singlet PESs for the O(<sup>3</sup>P,<sup>1</sup>D) + acrylonitrile reactions. The angles (°) are indicated in red, while the bond lengths (Å) are indicated in black.

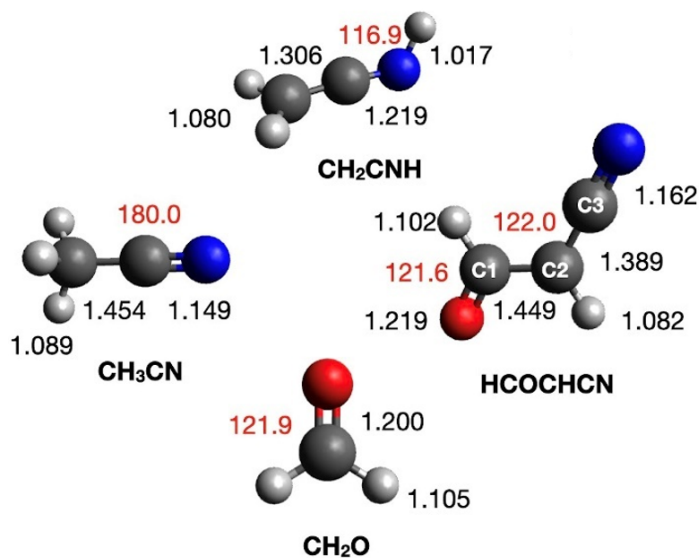

**Fig. S8:** B3LYP optimized geometries of the most important products identified on the triplet/singlet PESs for the O(<sup>3</sup>P,<sup>1</sup>D) + acrylonitrile reactions. The angles (°) are indicated in red, while the bond lengths (Å) are indicated in black.

**Table T2:** Relative energies (kJ/mol, 0K) of all the possible stationary points, including minima and transition states, identified in both the singlet and triplet PES for the reaction  $O(^3P) + CH_2CHCN$ , evaluated at the CCSD(T)/aug-cc-pVTZ//B3LYP/aug-cc-pVTZ level of theory.

|                     |             |                     |             |
|---------------------|-------------|---------------------|-------------|
| $O(^3P) + CH_2CHCN$ | 0 kJ/mol    | $^3TS31$            | -27 kJ/mol  |
| $^3MIN1$            | -5 kJ/mol   | $^3TS32$            | -72 kJ/mol  |
| $^3MIN2$            | -115 kJ/mol | $^3TS33$            | -122 kJ/mol |
| $^3MIN3$            | -108 kJ/mol | $^3TS34$            | +37 kJ/mol  |
| $^3MIN4$            | -176 kJ/mol | $^3TS35$            | +72 kJ/mol  |
| $^3MIN5$            | -71 kJ/mol  | $^3TS42$            | +117 kJ/mol |
| $^3MIN6$            | -179 kJ/mol | $^3TS43$            | +43 kJ/mol  |
| $^3MIN7$            | -133 kJ/mol | $O(^1D) + CH_2CHCN$ | +190 kJ/mol |
| $^3MIN8$            | -157 kJ/mol | $^1MIN1$            | -322 kJ/mol |
| $^3MIN9$            | -140 kJ/mol | $^1MIN2$            | -119 kJ/mol |
| $^3MIN10$           | -105 kJ/mol | $^1MIN3$            | -427 kJ/mol |
| $^3MIN11$           | -154 kJ/mol | $^1MIN4$            | -424 kJ/mol |
| $^3MIN12$           | -128 kJ/mol | $^1MIN7$            | -420 kJ/mol |
| $^3TS1$             | + 8 kJ/mol  | $^1MIN9$            | -334 kJ/mol |
| $^3TS2$             | -25 kJ/mol  | $^1MIN10$           | -330 kJ/mol |
| $^3TS3$             | -34 kJ/mol  | $^1MIN12$           | -313 kJ/mol |
| $^3TS4$             | -23 kJ/mol  | $^1MIN13$           | -25 kJ/mol  |
| $^3TS5$             | +56 kJ/mol  | $^1MIN14$           | -430 kJ/mol |
| $^3TS6$             | +5 kJ/mol   | $^1MIN15$           | -220 kJ/mol |
| $^3TS7$             | -65 kJ/mol  | $^1MIN16$           | -409 kJ/mol |
| $^3TS8$             | +126 kJ/mol | $^1TS1$             | -108 kJ/mol |
| $^3TS9$             | -134 kJ/mol | $^1TS2$             | -96 kJ/mol  |
| $^3TS10$            | +29 kJ/mol  | $^1TS3$             | -222 kJ/mol |
| $^3TS11$            | +51 kJ/mol  | $^1TS4$             | -124 kJ/mol |



---

|                   |             |                   |             |
|-------------------|-------------|-------------------|-------------|
| <sup>3</sup> TS12 | -25 kJ/mol  | <sup>1</sup> TS5  | -103 kJ/mol |
| <sup>3</sup> TS13 | +37 kJ/mol  | <sup>1</sup> TS6  | -58 kJ/mol  |
| <sup>3</sup> TS14 | +1 kJ/mol   | <sup>1</sup> TS7  | -318 kJ/mol |
| <sup>3</sup> TS15 | -19 kJ/mol  | <sup>1</sup> TS8  | -179 kJ/mol |
| <sup>3</sup> TS16 | +22 kJ/mol  | <sup>1</sup> TS9  | +13 kJ/mol  |
| <sup>3</sup> TS17 | +4 kJ/mol   | <sup>1</sup> TS10 | -102 kJ/mol |
| <sup>3</sup> TS18 | 0 kJ/mol    | <sup>1</sup> TS11 | -58 kJ/mol  |
| <sup>3</sup> TS19 | -14 kJ/mol  | <sup>1</sup> TS12 | -175 kJ/mol |
| <sup>3</sup> TS20 | -138 kJ/mol | <sup>1</sup> TS13 | -102 kJ/mol |
| <sup>3</sup> TS21 | -46 kJ/mol  | <sup>1</sup> TS14 | -418 kJ/mol |
| <sup>3</sup> TS22 | +27 kJ/mol  | <sup>1</sup> TS15 | -50 kJ/mol  |
| <sup>3</sup> TS23 | -94 kJ/mol  | <sup>1</sup> TS16 | -62 kJ/mol  |
| <sup>3</sup> TS24 | +23 kJ/mol  | <sup>1</sup> TS17 | -9 kJ/mol   |
| <sup>3</sup> TS25 | -101 kJ/mol | <sup>1</sup> TS18 | +14 kJ/mol  |
| <sup>3</sup> TS27 | -19 kJ/mol  | <sup>1</sup> TS19 | +180 kJ/mol |
| <sup>3</sup> TS28 | -60 kJ/mol  |                   |             |

---
